# Supplementary material
Source: PubMed Central journal article supplement (PMC1134935)
Supplement: bj3870085add.pdf [file bj3870085add.pdf]

## Supplement Data

### Sequences of primers

OP/CT-R TM6N 5'- TA(C/T)ITI(A/T/G)TITG(C/T)TGG(A/T/G)CITT(C/T)TT -3'  
OP/CT-R TM7aN 5'-GGTA(A/T/G)ATCCAIGG(A/G)TTII(A/T)(A/G)CAI(C/G)(A/T)(A/G)TT -3'  
OP/CT-R TM7a-2 5'- GCGAAI(A/G)IIA(A/T/G)(A/G)TA(A/T/G)ATCCAIGG(A/G)TT -3'  
CTR2 3'-1F 5'- <sup>1240</sup>CAGTTGTTGGAAATGCTGGTGTTCGTAGTAATTC<sup>1272</sup> -3'  
CTR2 3'-2F 5'- <sup>1257</sup>GGTGTTCGTAGTAATTCTACTGATGGCATGTCTA<sup>1289</sup> -3'  
OPR 3'-1F 5'- <sup>1148</sup>ACTGTTCTCATGGCTCGAAC<sup>1167</sup> -3'  
OPR 3'-2F 5'- <sup>1194</sup>AAACTCCTGCGCTGGTAATC<sup>1213</sup> -3'  
CTR2 5'-1R 5'- <sup>1557</sup>GGTCTGATGTCTTTCGTGGAG<sup>1537</sup> -3'  
CTR2 5'-2R 5'- <sup>1399</sup>GTAGTAGCAGCTACTTCCACTC<sup>1378</sup> -3'  
OPR 5'-1R 5'- <sup>1245</sup>GTGCAGCTATTCAGACTTGG<sup>1226</sup> -3'  
OPR 5'-2R 5'- <sup>1210</sup>TACCAGCGCAGGAGTTTGAG<sup>1191</sup> -3'  
CTR2 Fw1 5'- <sup>834</sup>AGCATCCCACAAGCAATCTTG<sup>854</sup> -3'  
CTR2 Fw2 5'- <sup>882</sup>AGTGGCATTATGACTGCTGG<sup>902</sup> -3'  
CTR2 Rv1 5'- <sup>1587</sup>TTACGTGGTTTTATCTGAATAAAATG<sup>1562</sup> -3'  
OPR Rv1 5'- <sup>1492</sup>CGAGAATGCATGTTAACAGGGAC<sup>1470</sup> -3'

I: inosine
